# Supplementary material for: Intermediates and mechanism in iron-catalyzed C–H methylation with trimethylaluminum
Source: Royal Society of Chemistry journal article supplement (doi:10.1039/d1cc05607g), 2021-01-01
Supplement: d1cc05607g1.pdf [file d1cc05607g1.pdf]

*Electronic Supporting Information for*

**Intermediates and Mechanism in Iron-Catalyzed C-H Methylation with  
Trimethylaluminum**

Shilpa Bhatia,<sup>‡</sup> Joshua C. DeMuth,<sup>‡</sup> Michael L. Neidig\*

Department of Chemistry, University of Rochester, Rochester, New York 14627, USA

Table of Contents

|   |                                                                             |    |
|---|-----------------------------------------------------------------------------|----|
| 1 | Experimental.....                                                           | 2  |
|   | 1.1 General Considerations .....                                            | 2  |
|   | 1.2 Experimental Methods .....                                              | 2  |
|   | 1.2.1 Mössbauer Spectroscopy .....                                          | 2  |
|   | 1.2.2 Electron Paramagnetic Resonance (EPR) Spectroscopy .....              | 2  |
|   | 1.2.3 <sup>1</sup> H, <sup>2</sup> H, <sup>31</sup> P NMR Spectroscopy..... | 2  |
|   | 1.3 Stoichiometric reaction of <b>4m</b> with DCB.....                      | 3  |
|   | 1.4 Preparation of Fe(dppen) <sub>2</sub> (Me) <sub>2</sub> .....           | 3  |
| 2 | Supplementary Spectroscopic Data.....                                       | 4  |
| 3 | X-ray Crystallography Data .....                                            | 13 |
|   | 3.1 CCDC Deposition .....                                                   | 13 |
|   | 3.2 Fe(dppen) <sub>2</sub> (Me) <sub>2</sub> .....                          | 13 |
| 4 | References .....                                                            | 27 |

## 1. Experimental

**1.1 General Considerations.** Unless noted otherwise, all starting materials were prepared using literature protocols.<sup>1, 2</sup> Reagents were purchased commercially and used without additional purification. Anhydrous solvents were further dried through activated-alumina filtration and stored on 4 Å molecular sieves under an inert nitrogen atmosphere. An enriched iron source of <sup>57</sup>Fe(acac)<sub>3</sub> was used for Mössbauer sample preparation and was synthesized using a previously published procedure with <sup>57</sup>Fe<sub>2</sub>O<sub>3</sub> (95%+ enriched) purchased from Isoflex.<sup>3</sup> All moisture and air-sensitive experiments were conducted in an MBraun inert-atmosphere N<sub>2</sub> glovebox equipped with a liquid nitrogen transfer line permitting rapid freeze-trapping of reaction samples for spectroscopic analysis. Additional experimental details are outlined in the electronic supporting information.

### 1.2 Experimental Methods

**1.2.1 Mössbauer Spectroscopy.** Freeze-trapped samples were prepared using enriched <sup>57</sup>Fe(acac)<sub>3</sub> under inert nitrogen atmosphere in a glovebox equipped with a liquid nitrogen transfer port to allow rapid freezing at 77 K. Samples were loaded into Delrin cups and subsequently freeze-trapped in liquid nitrogen. Low-temperature <sup>57</sup>Fe Mössbauer spectroscopic analysis was performed using a Janis SVT-400T N<sub>2</sub> cryostat for analysis at 80 K. Isomer shift values were calibrated against an α-Fe standard at 298 K. Fitting of the Mössbauer data was performed using WMoss (See Co.) software. The corresponding errors in the fit analyses include the following:  $\delta \pm 0.02$  mm/s,  $|\Delta E_Q| \pm 3$  %, multicomponent fit quantitation error of  $\pm 3$  %. Only zero-field Mossbauer measurements were collected, hence all quadrupole splitting parameters are reported as absolute values. Catalytic solution Mössbauer samples were prepared following the literature protocol for the catalysis and rapid freeze-trapping at specified timepoints.<sup>1,2</sup>

**1.2.2 Electron Paramagnetic Resonance Spectroscopy.** Catalytic solution EPR samples were prepared following the literature protocol for the catalysis and rapid freeze-trapping at specified timepoints.<sup>1,2</sup> In situ stoichiometric samples were prepared as described in the text and freeze-trapped at the specified timepoints. Spin integrated EPR samples were prepared in high-precision 4 mm OD Suprasil quartz EPR tubes from Wilmad Labglass, which allowed direct evaluation of signal intensities between samples. Samples were spin-integrated against an external standard of CuSO<sub>4</sub>•5H<sub>2</sub>O under non-saturating conditions. X-band EPR measurements were collected on a Bruker EMXplus spectrometer equipped with a 4119HS cavity and an Oxford ESR-900 helium flow cryostat.

**1.2.3 <sup>1</sup>H, <sup>2</sup>H, <sup>31</sup>P NMR Spectroscopy.** All NMR spectroscopic measurements were performed on a Bruker Avance 400 MHz NMR spectrometer at ambient temperature. Quantitative <sup>1</sup>H NMR analyses were performed with 1,3,5-trimethoxybenzene as an internal standard. Chemical shifts ( $\delta$ ) are reported in parts per million (ppm), and calibrated using the internal standard (1,3,5-trimethoxybenzene, 6.08 ppm) or residual solvent signals for <sup>1</sup>H NMR, the presence of naturally abundant deuterated solvent signals (THF-*d*<sub>8</sub> 1.73/3.58 ppm) for <sup>2</sup>H NMR, or non-ligated bisphosphine for <sup>31</sup>P NMR.

**1.3 Stoichiometric reaction of 4m with DCB.** A 20 mL scintillation vial was charged with  $^{57}\text{Fe}(\text{acac})_3$  (0.0106 g, 0.03 mmol),  $\text{Fe}(\text{acac})_3$  (0.0071 g, 0.02 mmol), **sub-AQ** (0.0131 g, 0.05 mmol), and THF (3.4 mL) and stirred for 10 minutes at room temperature followed by stirring for 10 minutes at 35 °C. In a separate 20 mL scintillation vial, a solution of  $\text{MeMgBr}$  (98  $\mu\text{L}$ , 1.025 M in hexane, 0.1 mmol) in THF (3.3 mL) was prepared and added to the above  $\text{Fe}(\text{acac})_3$ /**sub-AQ** solution dropwise over 10 mins at 35 °C and stirred for another 10 mins. In another 20 mL scintillation vial, a solution of **dppen** (0.0198g, 0.05mmol) with  $\text{MeMgBr}$  (98  $\mu\text{L}$ , 1.025 M in hexane, 0.1 mmol) in THF (3.3 mL) was prepared and subsequently added to the above solution dropwise over 10 mins at 35 °C. The resulting dark solution was stirred for 30 seconds and 3 ml of the solution was transferred to another 20 mL scintillation vial pre-heated at 35 °C for control samples. 1 ml from the control vial was freeze-trapped for  $^{57}\text{Fe}$  Mössbauer analysis followed by addition of DCB (200  $\mu\text{L}$ ) to the remaining 7 mL solution in the original vial. 1 mL aliquots of the resulting solution were freeze-trapped at various timepoints for  $^{57}\text{Fe}$  Mössbauer analysis. A duplicate experiment was performed for NMR analysis where samples were prepared by chemically quenching 1 mL aliquots of solution with water for analysis of product formation.

**1.4 Preparation of  $\text{Fe}(\text{dppen})_2(\text{Me})_2$ .**  $^{57}\text{Fe}(\text{acac})_3$  (0.071 g, 0.02 mmol),  $\text{Fe}(\text{acac})_3$  (0.0246 g, 0.07 mmol), **dppen** (0.0715 g, 0.18 mmol), and THF (15 mL) was added to a 20 mL scintillation vial and stirred for 30 minutes at room temperature. In a separate 20 mL scintillation vial, a solution of  $\text{AlMe}_3$  (675  $\mu\text{L}$ , 2 M in hexane) in THF (15 mL) was prepared. The  $\text{Fe}(\text{acac})_3$ /**dppen** solution was then transferred to a 100 mL round bottom flask and pre-heated to 55 °C on an aluminum pie-block for 20 minutes. Next, the solution of  $\text{AlMe}_3$  was added dropwise (750  $\mu\text{L}/\text{min}$ , 20 min) to the solution of iron and bisphosphine at 55 °C. After the addition, the flask was transferred to an oil recirculating bath cooled aluminum pie-block at 0 °C and concentrated to an overall volume of 9 mL. The concentrated solution was then split equally between three 20 mL scintillation vials. To each scintillation vial, 4.5 mL of chilled hexane (0 °C) was added while stirring. After stirring for two minutes, the solution was allowed to settle for five minutes at 0 °C. Each vial of solution was then filtered through a 1 cm Celite pad into clean 20 mL scintillation vials. The vials were then stored in a -30 °C freezer. Red-orange crystals were observed in each vial within 12-24 h.

## 2. Supplementary Spectroscopic Data

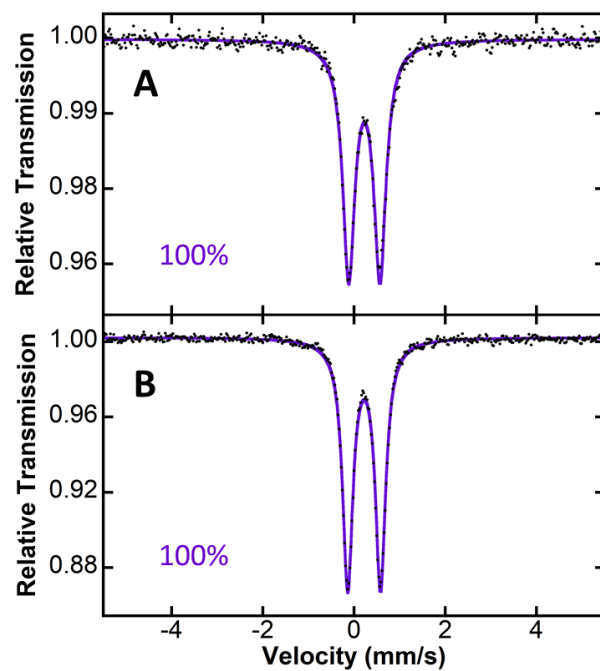

**Figure S1.** 80 K  $^{57}\text{Fe}$  Mössbauer spectra of crystalline  $\text{Fe}(\text{dppn})_2(\text{Me})_2$  (**5m**) (A) crushed into fine powder and (B) redissolved in THF. Data (black dots) and fit components are shown. Purple component for the solid spectrum has parameters  $\delta = 0.22$  mm/s and  $|\Delta E_Q| = 0.69$  mm/s and for the solution spectrum has parameters  $\delta = 0.22$  mm/s and  $|\Delta E_Q| = 0.72$  mm/s.

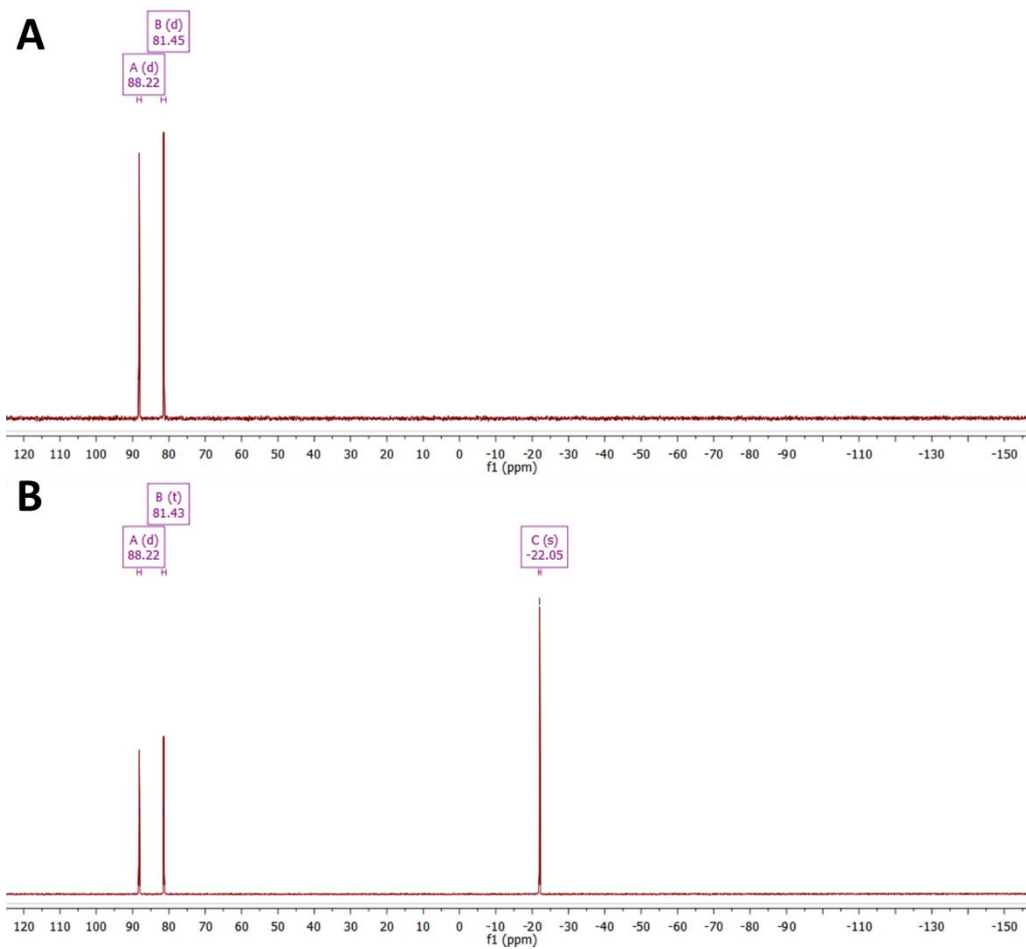

**Figure S2.**  $^{31}\text{P}$  NMR spectra of (A) a solution of  $\text{Fe}(\text{Me})_2(\text{dppen})_2$  (**5m**) crystals dissolved in  $\text{THF-}d_8$  and (B) a similar solution spiked with non-ligated dppen (-22 ppm).

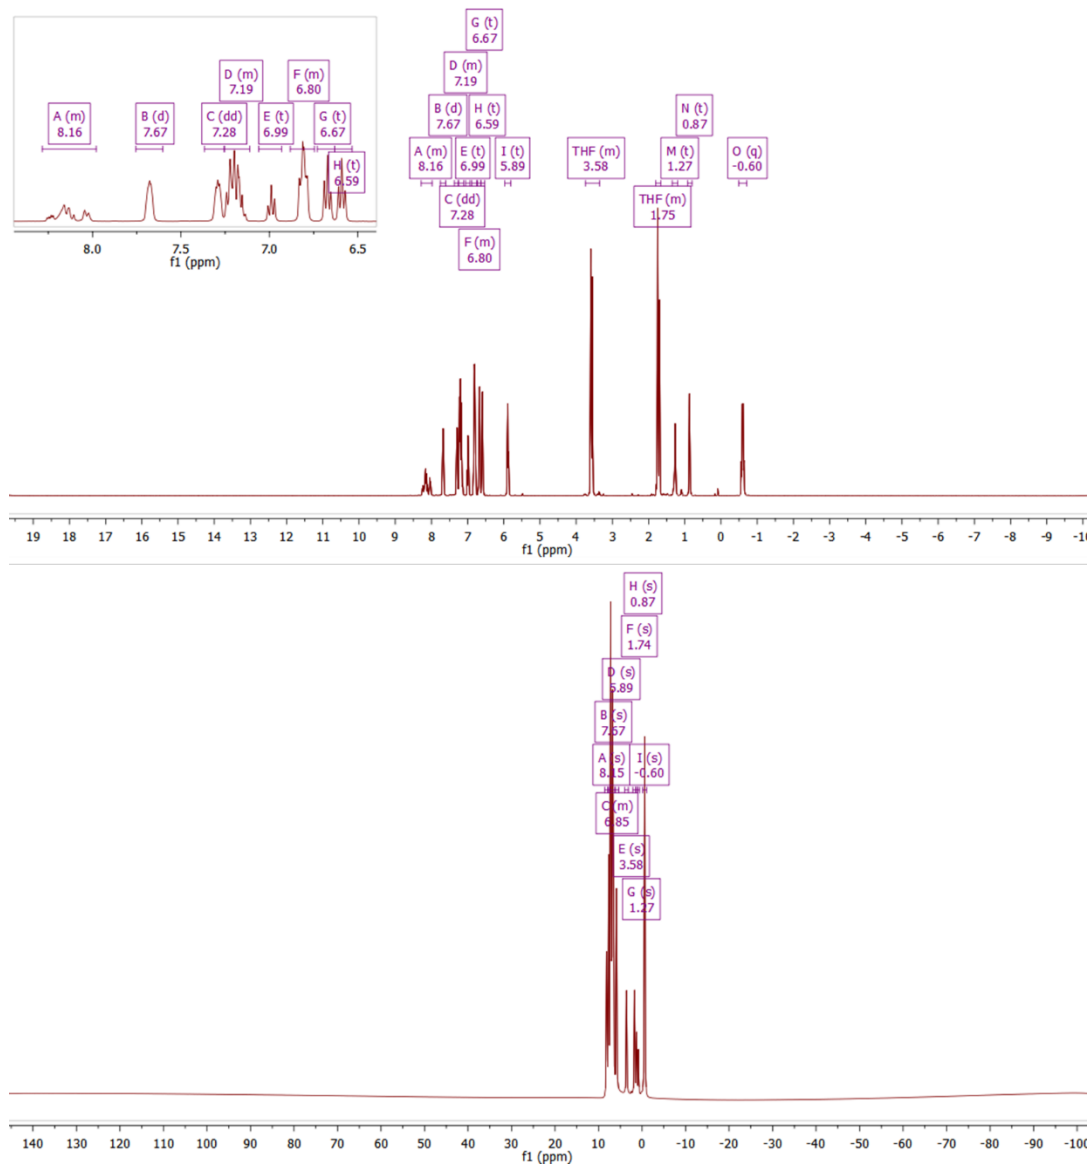

**Figure S3.** Paramagnetic <sup>1</sup>H NMR spectrum (top) and diamagnetic <sup>1</sup>H NMR spectrum (bottom) of crystalline Fe(Me)<sub>2</sub>(dppen)<sub>2</sub> (**5m**) dissolved in THF-d<sub>8</sub>. The absence of signals beyond the diamagnetic range are consistent with the assignment of this species as diamagnetic.

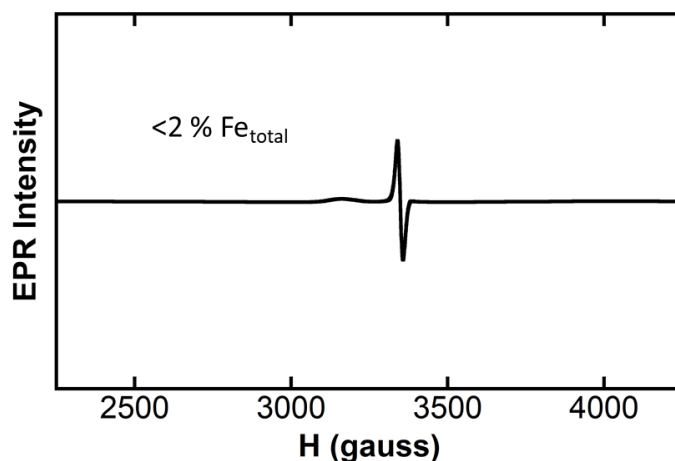

**Figure S4.** 10 K EPR analysis 10 minutes after the dropwise addition of  $\text{AlMe}_3$  (2.0 equiv) to a solution of **sub-AQ** (1.0 equiv),  $\text{Fe}(\text{acac})_3$  (1.0 mol %), and dppen (1.1 mol %) in THF at RT. The g-value corresponds to an  $S = \frac{1}{2}$  species quantified at less than 2 % of the total iron in solution.

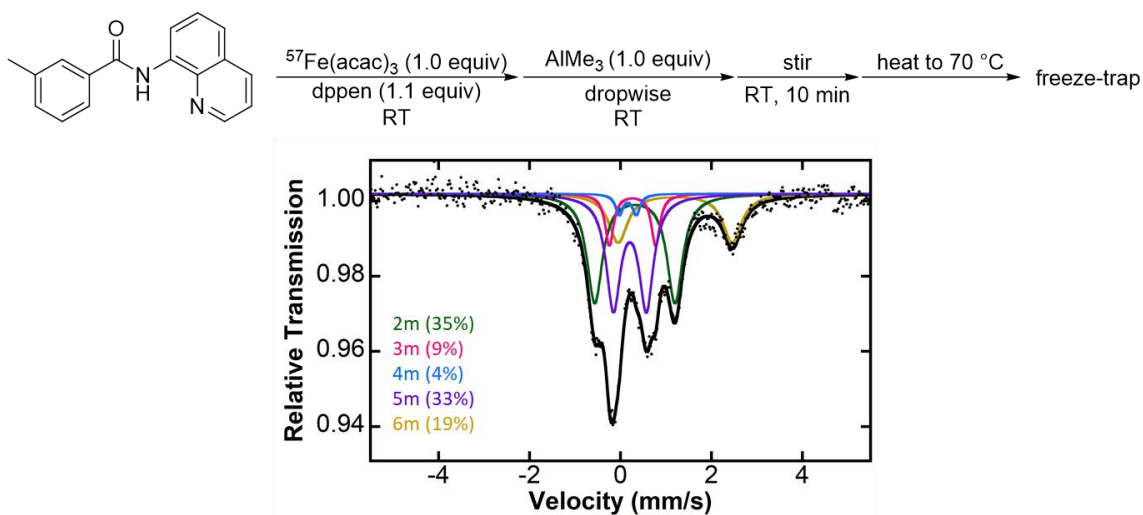

**Figure S5.** Freeze-quenched 80 K  $^{57}\text{Fe}$  Mössbauer spectrum following the reaction of a solution of **sub-AQ** (1.0 equiv),  $\text{Fe}(\text{acac})_3$ , and dppen (1.1 equiv) with  $\text{AlMe}_3$  (1.0 equiv) at RT for 10 min then heated to 70 °C for 5 min. The green species has parameters  $\delta = 0.32$  mm/s and  $|\Delta E_Q| = 1.76$  mm/s consistent with **2m**. The pink species has parameters  $\delta = 0.27$  mm/s and  $|\Delta E_Q| = 1.02$  mm/s consistent with **3m**. The light blue has parameters  $\delta = 0.16$  mm/s and  $|\Delta E_Q| = 0.37$  mm/s consistent with **4m**. The purple species has parameters  $\delta = 0.21$  mm/s and  $|\Delta E_Q| = 0.73$  mm/s consistent with  $\text{Fe}(\text{dppen})_2(\text{Me})_2$  (**5m**). The yellow species (**6m**) has parameters  $\delta = 1.21$  mm/s and  $|\Delta E_Q| = 2.51$  mm/s consistent with a high-spin iron(II) complex, an assignment further confirmed by its formation by reduction of  $\text{Fe}(\text{acac})_3$  with  $\text{AlMe}_3$  (Figure S10).

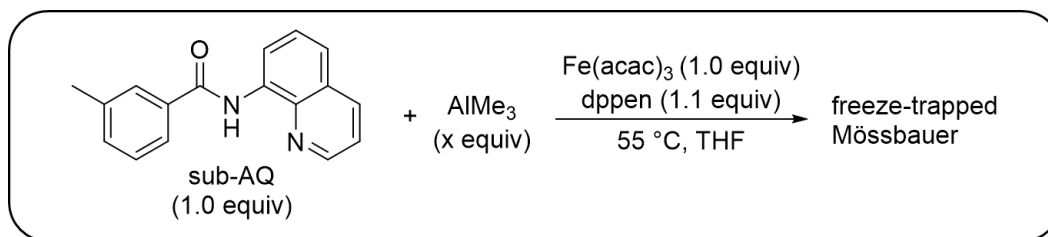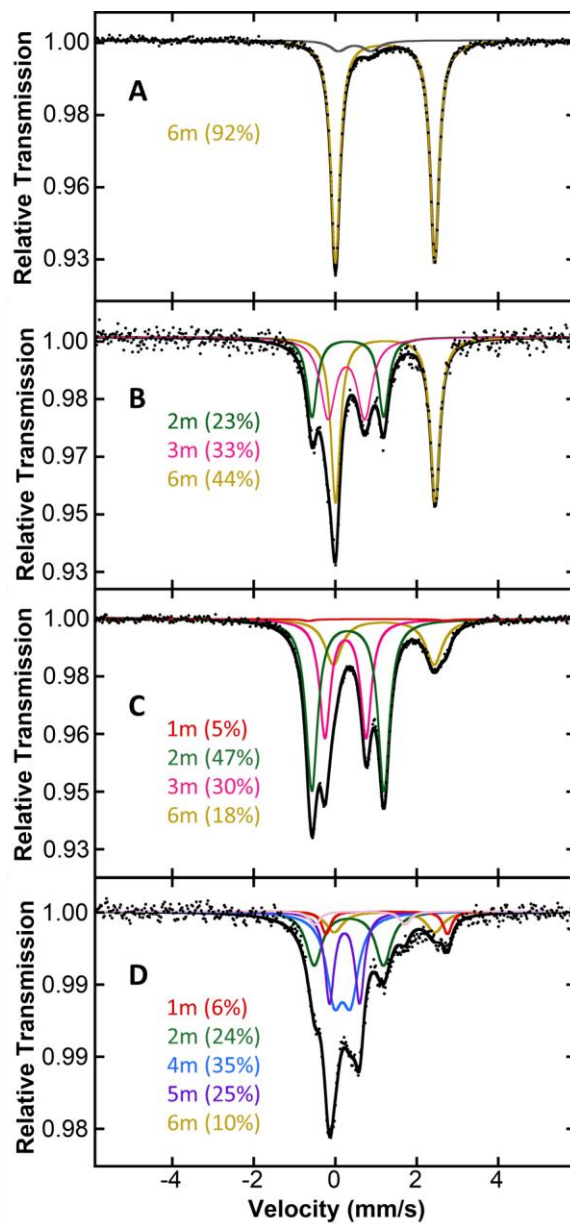

**Figure S6.** Freeze-quenched 80 K <sup>57</sup>Fe Mössbauer spectrum following the reaction of a solution of sub-AQ (1.0 equiv), Fe(acac)<sub>3</sub> (1.0 equiv), and dppen (1.1 equiv) with (A) 0.33 equiv (B) 0.67 equiv, (C) 1.0 equiv, and (D) 1.33 equiv AlMe<sub>3</sub> at 55 °C.



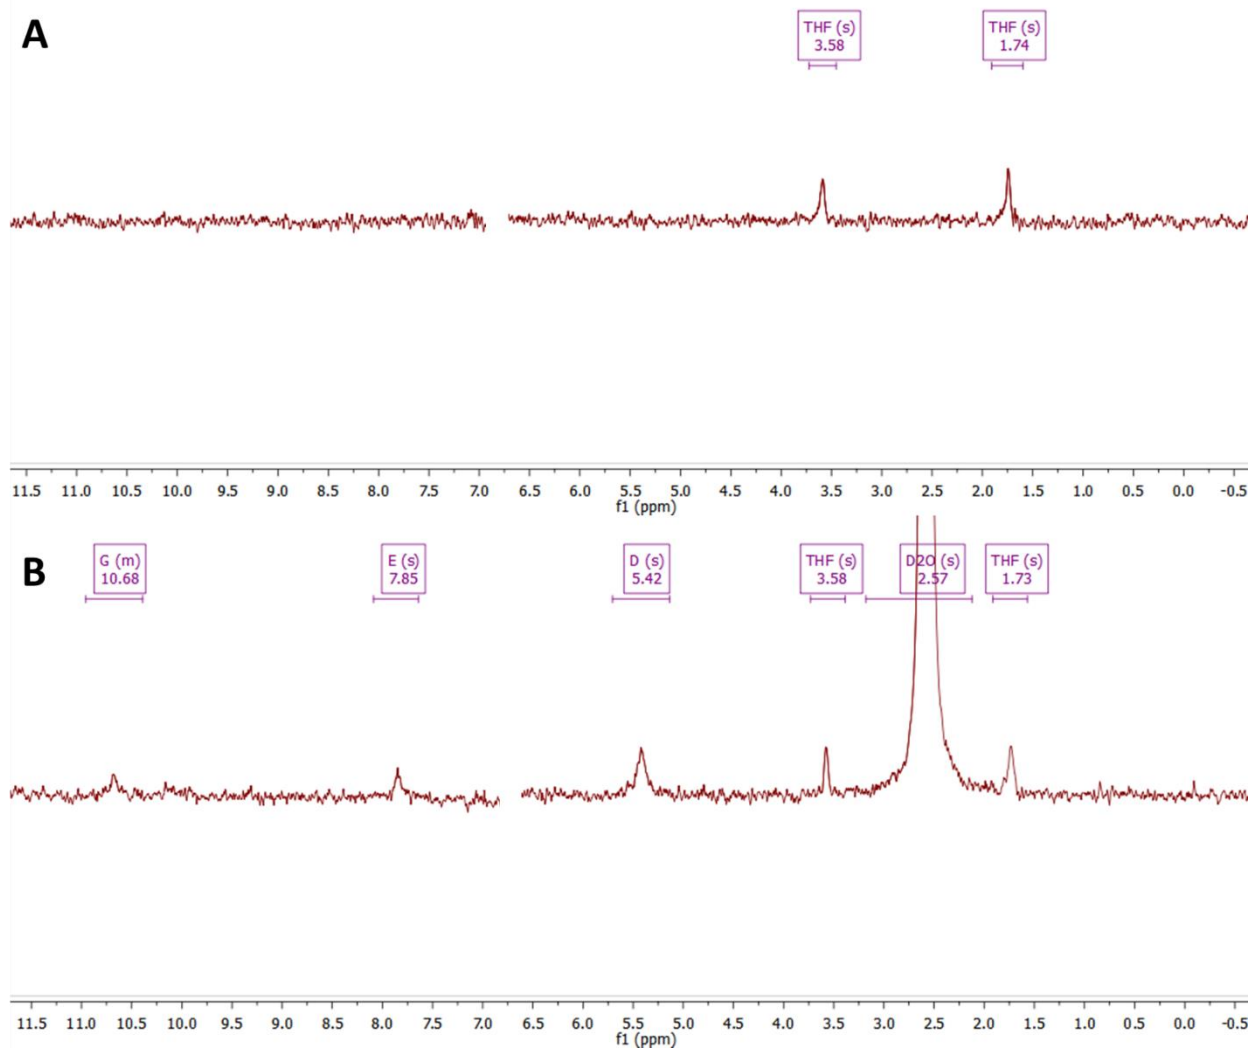

**Figure S7.** The  $^2\text{H}$  NMR spectrum of (A) in situ generated **2m** (47 % total iron) and **3m** (30 %) with minor amounts of **1m** and a high-spin iron(II) **6m** and (B) the  $^2\text{H}$  NMR spectrum following a chemical quench of that solution with excess deuterium oxide. The presence of signal in the aromatic region (7.85 ppm) is consistent with aromatic deuterium incorporation resulting from the quenching of a cyclometalated iron species. The signals at 3.58 ppm and 1.73 ppm are from the presence of THF- $d_8$  in natural abundance. The region containing 6.70-6.80 ppm contains an instrument artifact in  $^2\text{H}$  NMR and cannot be used. The signal at 10.68 ppm is consistent with deuterium incorporation at the amide nitrogen, and the signal at 5.42 ppm is consistent with deuterium incorporation of acetylacetonate ligand.

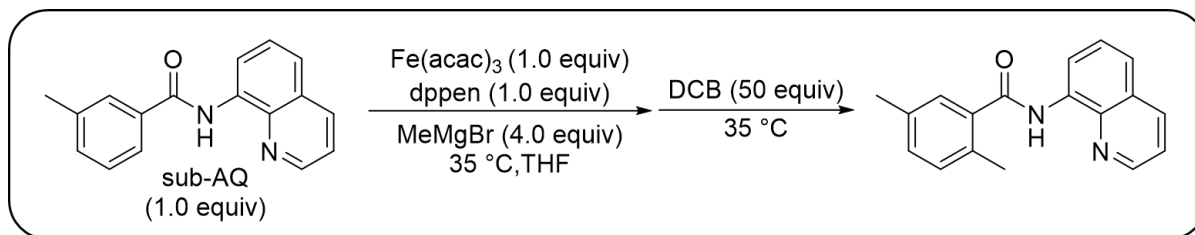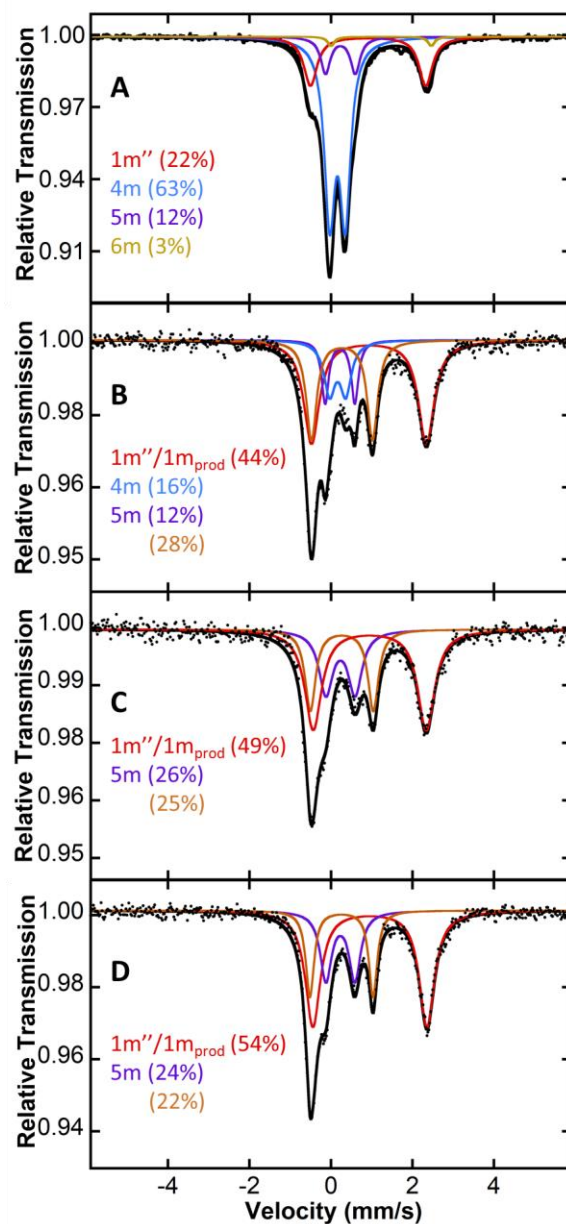

**Figure S8.** 80 K  $^{57}\text{Fe}$  Mössbauer spectrum of (A) a freeze-trapped solution following the reaction of **sub-AQ** (1.0 equiv),  $\text{Fe}(\text{acac})_3$  (1.0 equiv), and **dppen** (1.0 equiv) with  $\text{MeMgBr}$  (4.0 equiv) at 35 °C, and the subsequent reaction with excess **DCB** (50 equiv) at 35 °C for (B) 30 s, (C) 1 min, and (D) 10 min. Data (black dots) and fit components are shown. Blue component **4m** has parameters  $\delta = 0.16$  mm/s and  $|\Delta E_Q| = 0.39$  mm/s. The orange component has parameters  $\delta = 0.26$  mm/s and  $|\Delta E_Q| = 1.51$  mm/s. Note that the parameters of the red component are consistent with those of **1m''/1m'**, however a **1m''** notation is used as an analogue with a bromide ligand cannot be excluded. Similarly, a product bound analogue of this species (**1m<sub>prod</sub>**) bearing a bromide ligand could also form upon reaction of **4m** with oxidant.

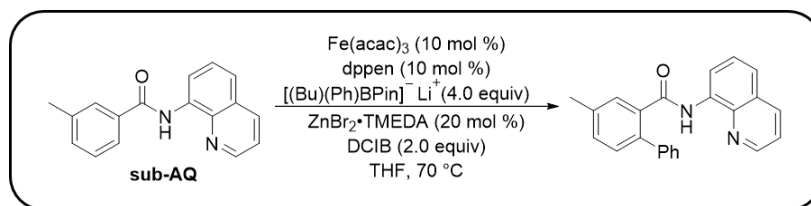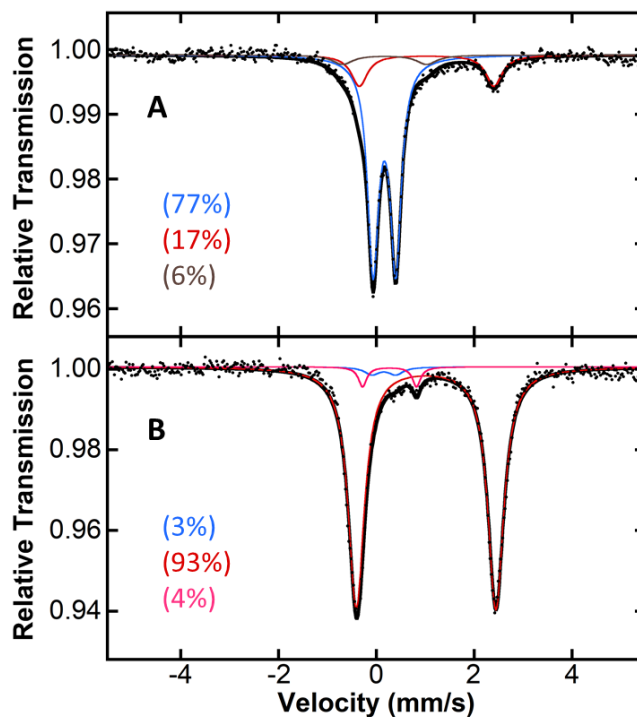

**Figure S9.** 80 K  $^{57}\text{Fe}$  Mössbauer spectrum of the iron-catalyzed arylation of **sub-AQ** with phenylboronate reagent freeze-quenched following (A) one hour and (B) four hours of reaction. Data (black dots) and fit components are shown. The corresponding 5 K EPR spectra at both timepoints revealed that the major species are EPR silent. The individual component Mössbauer parameters are the following: blue component,  $\delta = 0.16$  mm/s and  $|\Delta E_Q| = 0.47$  mm/s, red component,  $\delta = 1.02$  mm/s and  $|\Delta E_Q| = 2.80$  mm/s, dark brown component has parameters  $\delta = 0.17$  mm/s and  $|\Delta E_Q| = 1.72$  mm/s, and pink component,  $\delta = 0.27$  mm/s and  $|\Delta E_Q| = 1.10$  mm/s. Note that the parameters of the blue component are similar to those of the low-spin cyclometalated species **4m**, while the parameters of the red component are consistent with those of a high-spin iron(II) species.

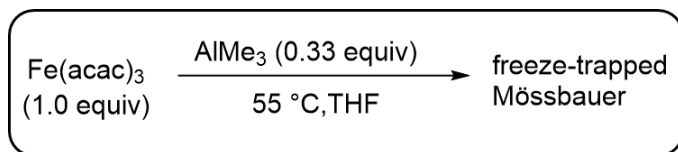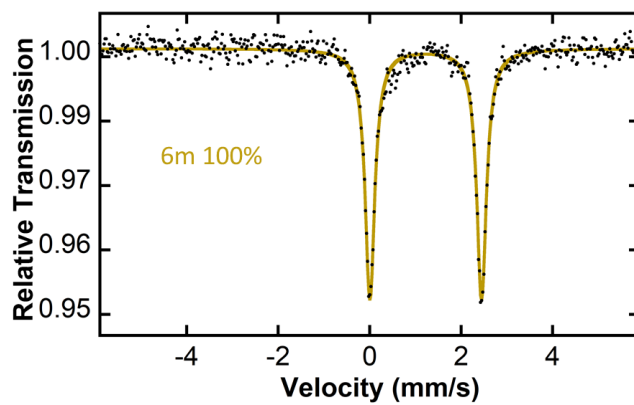

**Figure S10.** 80 K  $^{57}\text{Fe}$  Mössbauer spectrum of a freeze-trapped solution following the reaction of  $\text{Fe}(\text{acac})_3$  (1.0 equiv) with  $\text{AlMe}_3$  (0.33 equiv). Data (black dots) and fit components are shown. Yellow component has parameters  $\delta = 1.23$  mm/s and  $|\Delta E_Q| = 2.45$  mm/s. These parameters are consistent with the reduction of  $\text{Fe}(\text{acac})_3$  to a high-spin iron(II) complex.

### 3. X-ray Crystallographic Data

**3.1 CCDC Deposition.** The reported crystal structure has been deposited with the Cambridge Crystallographic Data Center (CCDC). The crystal structure was assigned the following CCDC deposition number:

$\text{Fe}(\text{dppen})_2(\text{Me})_2$ : 2111349

### 3.2 $\text{Fe}(\text{dppen})_2(\text{Me})_2$

REFERENCE NUMBER: neijd07  
CRYSTAL STRUCTURE REPORT

$\text{C}_{54} \text{H}_{50} \text{Fe} \text{P}_4$

or

$\text{Fe}(\text{dppen})_2(\text{Me})_2 \cdot x\text{Solvent}$

Report prepared for:

J. DeMuth, Prof. M. Neidig

August 23, 2021

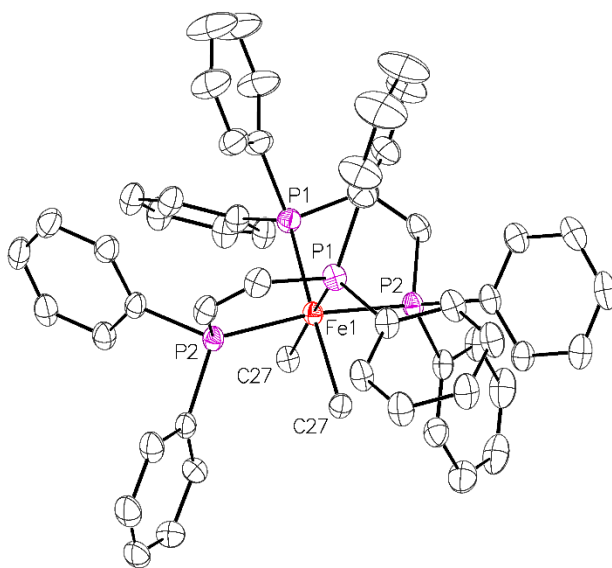

William W. Brennessel  
X-ray Crystallographic Facility  
Department of Chemistry, University of Rochester  
120 Trustee Road  
Rochester, NY 14627

### Data collection

A crystal (0.295 x 0.215 x 0.104 mm<sup>3</sup>) was placed onto a thin glass optical fiber or a nylon loop and mounted on a Rigaku XtaLAB Synergy-S Dualflex diffractometer equipped with a HyPix-6000HE HPC area detector for data collection at 100.00(10) K. A preliminary set of cell constants and an orientation matrix were calculated from a small sampling of reflections.<sup>1</sup> A short pre-experiment was run, from which an optimal data collection strategy was determined. The full data collection was carried out using a PhotonJet (Cu) X-ray source with frame times of 0.71 and 2.86 seconds and a detector distance of 34.0 mm. Series of frames were collected in 0.50° steps in  $\omega$  at different  $2\theta$ ,  $\kappa$ , and  $\phi$  settings. After the intensity data were corrected for absorption, the final cell constants were calculated from the xyz centroids of 24188 strong reflections from the actual data collection after integration.<sup>1</sup> See Table 1 for additional crystal and refinement information.

### Structure solution and refinement

The structure was solved using SHELXT<sup>2</sup> and refined using SHELXL.<sup>3</sup> The space group *C2/c* was determined based on systematic absences and intensity statistics. Most or all non-hydrogen atoms were assigned from the solution. Full-matrix least squares / difference Fourier cycles were performed which located any remaining non-hydrogen atoms. All non-hydrogen atoms were refined with anisotropic displacement parameters. The methyl ligand's hydrogen atoms were found from the difference Fourier map and refined freely. All other hydrogen atoms were placed in ideal positions and refined as riding atoms with relative isotropic displacement parameters.

Reflection contributions from highly disordered solvent were fixed and added the calculated structures using the SQUEEZE routine of program Platon,<sup>4</sup> which determined there to be 520 electrons in 1965 Å<sup>3</sup> per unit cell treated this way. Because the exact identity and amount of solvent were unknown, no solvent was included in the atom list or molecular formula. Thus all calculated quantities that derive from the molecular formula (e.g., F(000), density, molecular weight, etc.) are known to be inaccurate.

The final full matrix least squares refinement converged to  $R1 = 0.0464$  ( $F^2$ ,  $I > 2\sigma(I)$ ) and  $wR2 = 0.1262$  ( $F^2$ , all data).

### Structure description

The structure is the one suggested. The asymmetric unit contains one-half of an iron molecule on a crystallographic two-fold axis that includes the metal center and highly disordered solvent molecules whose individual atoms were not assigned (see above).

Structure manipulation and figure generation were performed using Olex2.<sup>5</sup> Unless noted otherwise all structural diagrams containing anisotropic displacement ellipsoids are drawn at the 50 % probability level.

Data collection, structure solution, and structure refinement were conducted at the X-ray Crystallographic Facility, B04 Hutchison Hall, Department of Chemistry, University of Rochester. The instrument was purchased with funding from NSF MRI program grant CHE-1725028. All publications arising from this report MUST either 1) include William W. Brennessel as a coauthor or 2) acknowledge William W. Brennessel and the X-ray Crystallographic Facility of the Department of Chemistry at the University of Rochester.

- 
- <sup>1</sup> *CrysAlisPro*, version 171.41.112a; Rigaku Corporation: Oxford, UK, 2021.  
<sup>2</sup> Sheldrick, G. M. *SHELXT*, version 2018/2; *Acta. Crystallogr.* **2015**, *A71*, 3-8.  
<sup>3</sup> Sheldrick, G. M. *SHELXL*, version 2018/3; *Acta. Crystallogr.* **2015**, *C71*, 3-8.  
<sup>4</sup> Spek, A. L. *PLATON*, version 250420; *Acta. Crystallogr.* **2015**, *C71*, 9-18.  
<sup>5</sup> Dolomanov, O. V.; Bourhis, L. J.; Gildea, R. J.; Howard, J. A. K.; Puschmann, H. *Olex2*, version 1.3-ac4; *J. Appl. Cryst.* **2009**, *42*, 339-341.

Some equations of interest:

$$R_{\text{int}} = \Sigma |F_o^2 - \langle F_o^2 \rangle| / \Sigma |F_o^2|$$

$$R1 = \Sigma ||F_o| - |F_c|| / \Sigma |F_o|$$

$$wR2 = [\Sigma [w(F_o^2 - F_c^2)^2] / \Sigma [w(F_o^2)^2]]^{1/2}$$

where  $w = 1 / [\sigma^2 (F_o^2) + (aP)^2 + bP]$  and

$$P = 1/3 \max (0, F_o^2) + 2/3 F_c^2$$

$$\text{GOF} = S = [\Sigma [w(F_o^2 - F_c^2)^2] / (m-n)]^{1/2}$$

where  $m$  = number of reflections and  $n$  = number of parameters

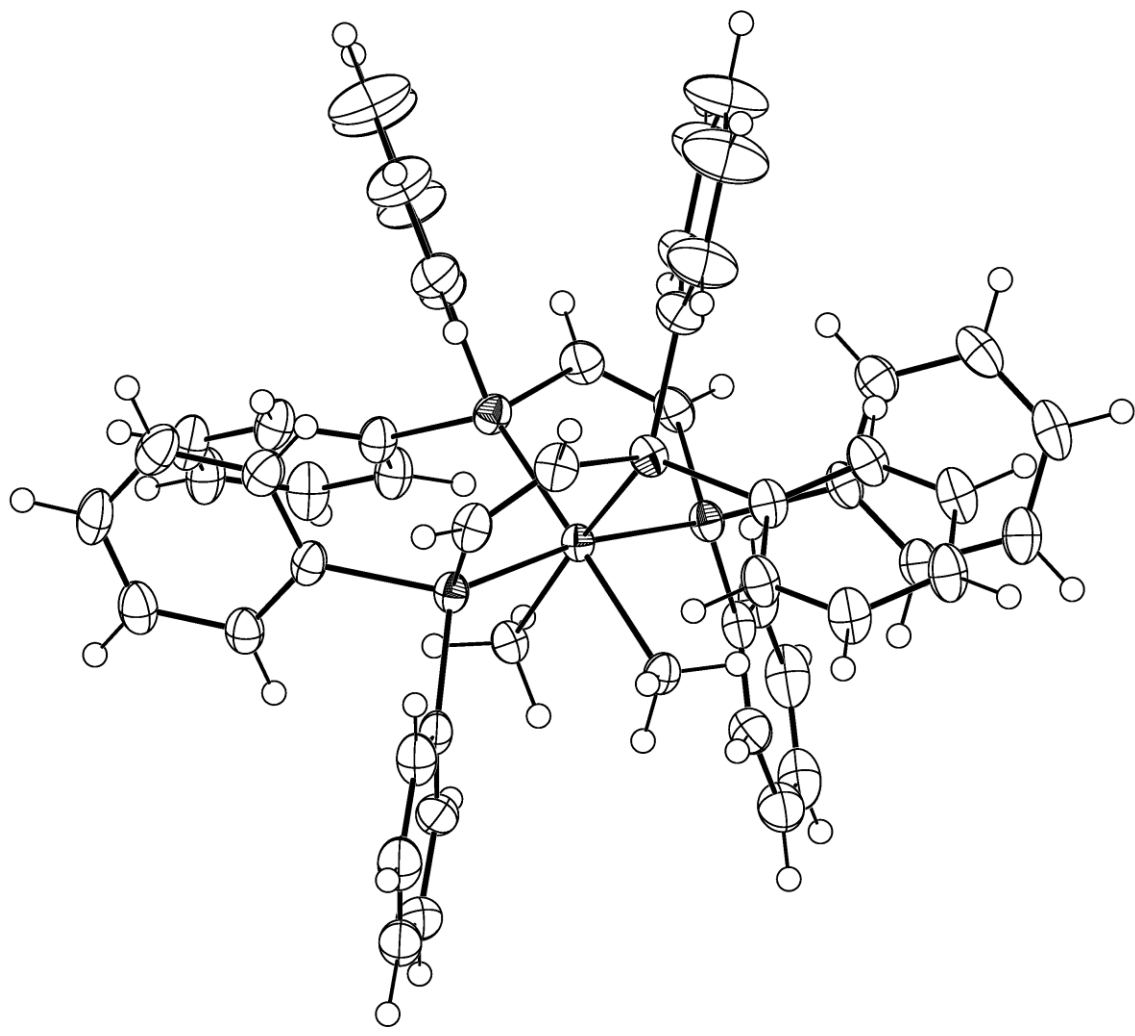



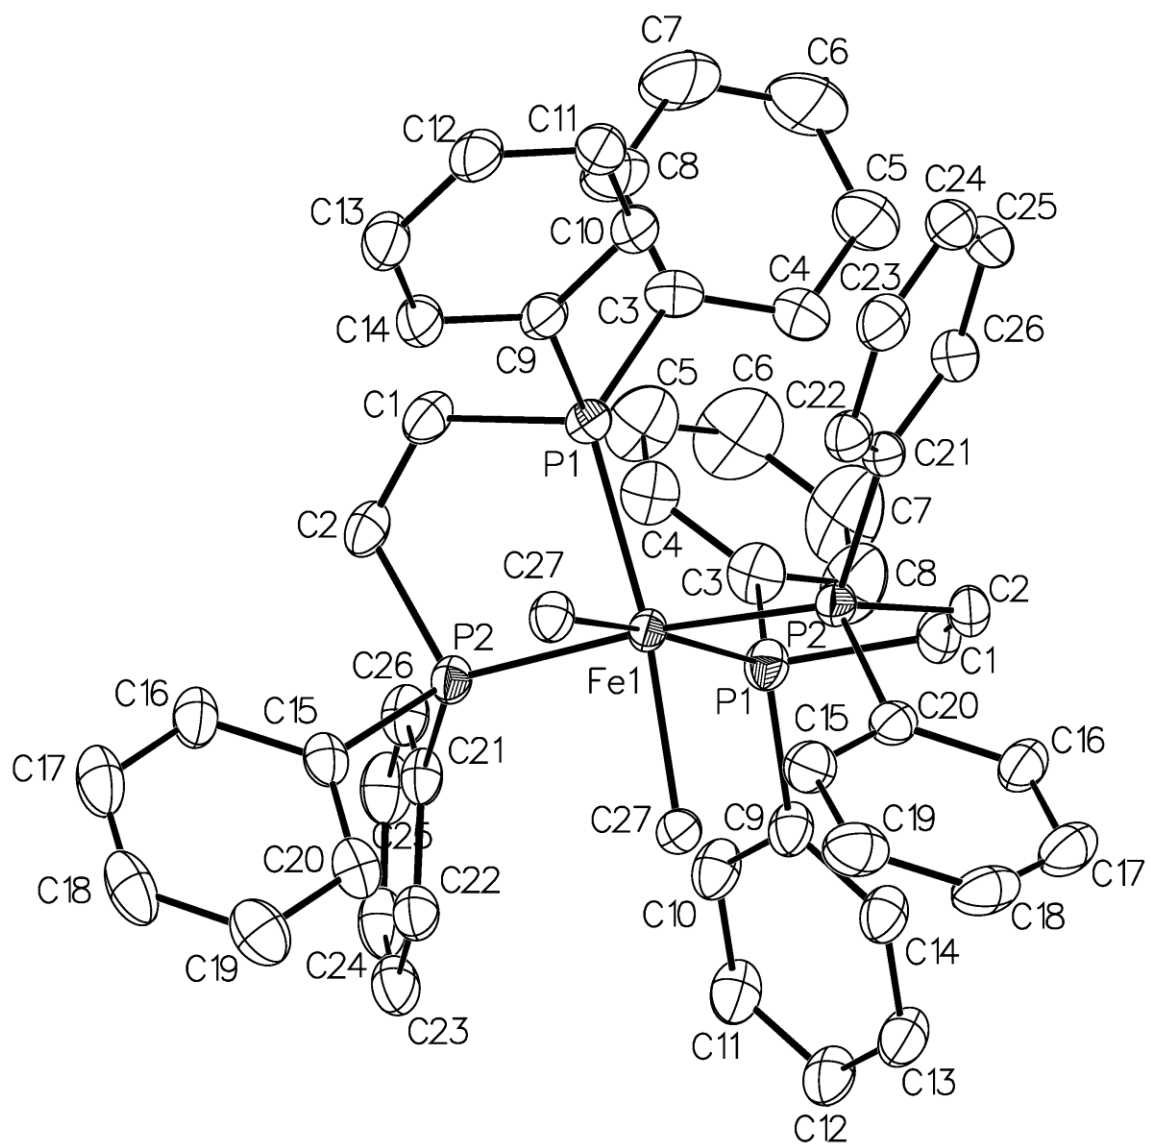

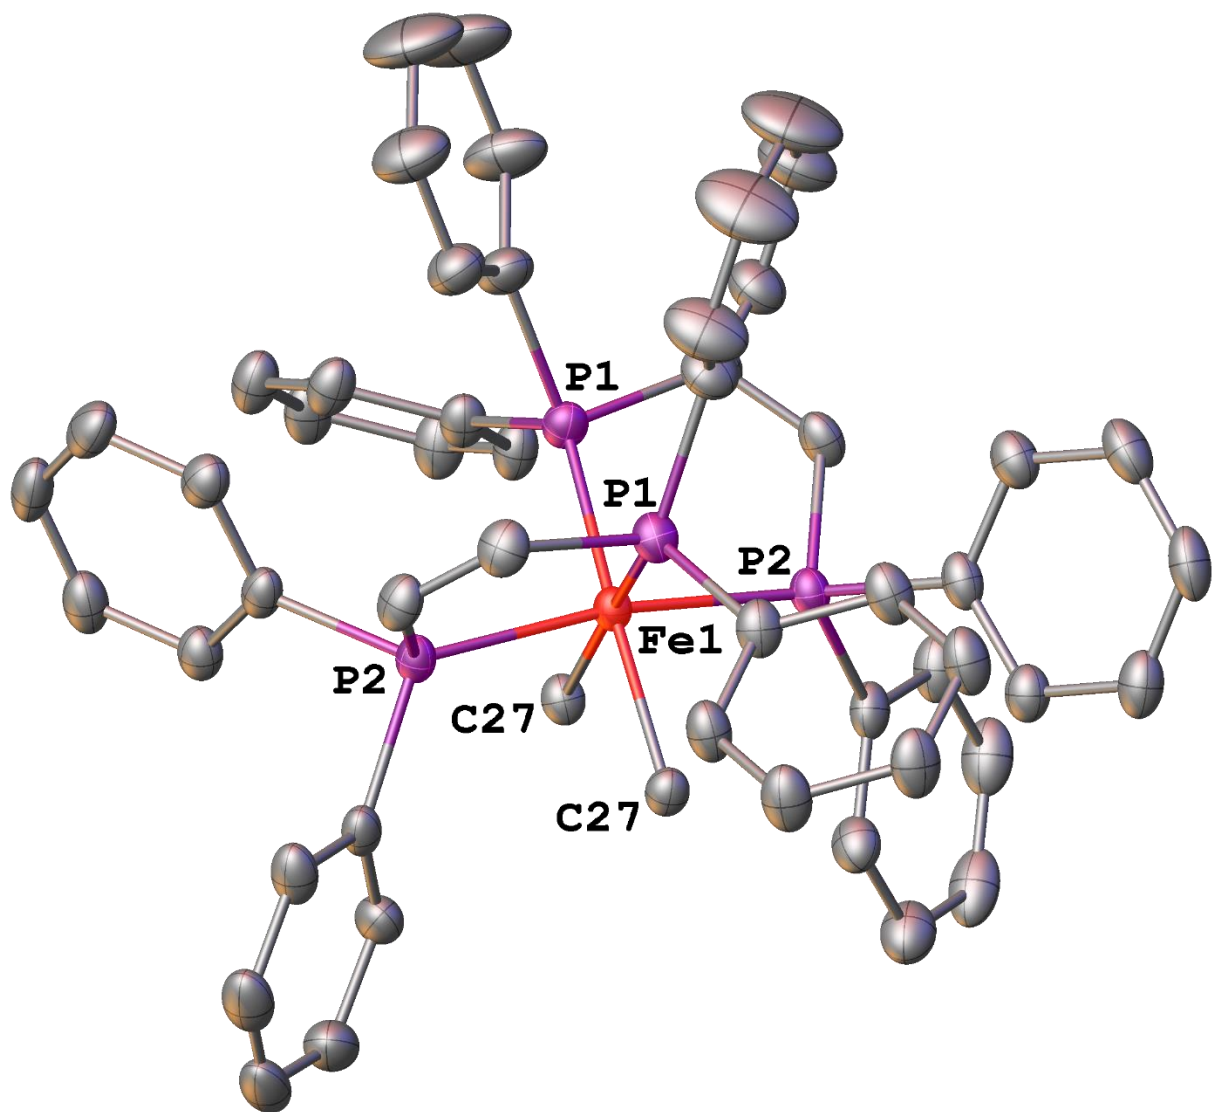

Table 1. Crystal data and structure refinement for neijd07.

|                                        |                                                              |                             |
|----------------------------------------|--------------------------------------------------------------|-----------------------------|
| Identification code                    | neijd07                                                      |                             |
| Empirical formula                      | C <sub>54</sub> H <sub>50</sub> Fe P <sub>4</sub>            |                             |
| Formula weight                         | 878.67                                                       |                             |
| Temperature                            | 100.00(10) K                                                 |                             |
| Wavelength                             | 1.54184 Å                                                    |                             |
| Crystal system                         | monoclinic                                                   |                             |
| Space group                            | C2/c                                                         |                             |
| Unit cell dimensions                   | $a = 11.40452(13)$ Å                                         | $\alpha = 90^\circ$         |
|                                        | $b = 26.0935(3)$ Å                                           | $\beta = 96.6965(10)^\circ$ |
|                                        | $c = 19.63981(19)$ Å                                         | $\gamma = 90^\circ$         |
| Volume                                 | 5804.62(11) Å <sup>3</sup>                                   |                             |
| Z                                      | 4                                                            |                             |
| Density (calculated)                   | 1.005 Mg/m <sup>3</sup>                                      |                             |
| Absorption coefficient                 | 3.336 mm <sup>-1</sup>                                       |                             |
| $F(000)$                               | 1840                                                         |                             |
| Crystal color, morphology              | red, block                                                   |                             |
| Crystal size                           | 0.295 x 0.215 x 0.104 mm <sup>3</sup>                        |                             |
| Theta range for data collection        | 3.388 to 80.310°                                             |                             |
| Index ranges                           | $-14 \leq h \leq 14, -32 \leq k \leq 33, -25 \leq l \leq 23$ |                             |
| Reflections collected                  | 48565                                                        |                             |
| Independent reflections                | 6239 [ $R(\text{int}) = 0.0761$ ]                            |                             |
| Observed reflections                   | 5773                                                         |                             |
| Completeness to theta = 74.504°        | 99.8%                                                        |                             |
| Absorption correction                  | Multi-scan                                                   |                             |
| Max. and min. transmission             | 1.00000 and 0.49271                                          |                             |
| Refinement method                      | Full-matrix least-squares on $F^2$                           |                             |
| Data / restraints / parameters         | 6239 / 0 / 279                                               |                             |
| Goodness-of-fit on $F^2$               | 1.050                                                        |                             |
| Final $R$ indices [ $I > 2\sigma(I)$ ] | $R1 = 0.0464, wR2 = 0.1243$                                  |                             |
| $R$ indices (all data)                 | $R1 = 0.0491, wR2 = 0.1262$                                  |                             |
| Largest diff. peak and hole            | 0.900 and -0.449 e.Å <sup>-3</sup>                           |                             |

Table 2. Atomic coordinates ( $\times 10^4$ ) and equivalent isotropic displacement parameters ( $\text{\AA}^2 \times 10^3$ ) for neijd07.  $U_{\text{eq}}$  is defined as one third of the trace of the orthogonalized  $U_{ij}$  tensor.

|     | x       | y       | z       | $U_{\text{eq}}$ |
|-----|---------|---------|---------|-----------------|
| Fe1 | 5000    | 6871(1) | 2500    | 19(1)           |
| P1  | 3501(1) | 6336(1) | 2195(1) | 25(1)           |
| P2  | 4284(1) | 6941(1) | 3498(1) | 22(1)           |
| C1  | 2714(2) | 6236(1) | 2950(1) | 30(1)           |
| C2  | 3038(2) | 6502(1) | 3511(1) | 28(1)           |
| C3  | 3607(2) | 5667(1) | 1899(1) | 34(1)           |
| C4  | 4657(2) | 5484(1) | 1698(1) | 36(1)           |
| C5  | 4751(3) | 4983(1) | 1479(2) | 53(1)           |
| C6  | 3800(3) | 4660(1) | 1454(2) | 75(1)           |
| C7  | 2738(3) | 4837(1) | 1645(2) | 76(1)           |
| C8  | 2643(2) | 5335(1) | 1865(2) | 54(1)           |
| C9  | 2187(2) | 6518(1) | 1594(1) | 28(1)           |
| C10 | 2097(2) | 6374(1) | 905(1)  | 32(1)           |
| C11 | 1104(2) | 6505(1) | 459(1)  | 36(1)           |
| C12 | 193(2)  | 6780(1) | 691(1)  | 36(1)           |
| C13 | 273(2)  | 6924(1) | 1372(1) | 37(1)           |
| C14 | 1265(2) | 6794(1) | 1820(1) | 32(1)           |
| C15 | 3630(2) | 7549(1) | 3766(1) | 26(1)           |
| C16 | 2576(2) | 7551(1) | 4067(1) | 34(1)           |
| C17 | 2115(2) | 8002(1) | 4300(1) | 42(1)           |
| C18 | 2694(2) | 8455(1) | 4247(1) | 44(1)           |
| C19 | 3747(2) | 8466(1) | 3951(1) | 40(1)           |
| C20 | 4206(2) | 8017(1) | 3710(1) | 32(1)           |
| C21 | 5112(2) | 6779(1) | 4337(1) | 26(1)           |
| C22 | 5837(2) | 7141(1) | 4702(1) | 29(1)           |
| C23 | 6470(2) | 7016(1) | 5328(1) | 35(1)           |
| C24 | 6402(2) | 6527(1) | 5592(1) | 38(1)           |
| C25 | 5674(2) | 6166(1) | 5241(1) | 38(1)           |
| C26 | 5029(2) | 6291(1) | 4618(1) | 32(1)           |
| C27 | 6242(2) | 7445(1) | 2830(1) | 25(1)           |

Table 3. Bond lengths [ $\text{\AA}$ ] and angles [ $^\circ$ ] for neijd07.

|               |            |                     |            |
|---------------|------------|---------------------|------------|
| Fe(1)-P(1)#1  | 2.2338(5)  | C(13)-H(13)         | 0.9500     |
| Fe(1)-P(1)    | 2.2338(5)  | C(13)-C(14)         | 1.392(3)   |
| Fe(1)-P(2)    | 2.2163(4)  | C(14)-H(14)         | 0.9500     |
| Fe(1)-P(2)#1  | 2.2163(4)  | C(15)-C(16)         | 1.400(3)   |
| Fe(1)-C(27)   | 2.1093(19) | C(15)-C(20)         | 1.396(3)   |
| Fe(1)-C(27)#1 | 2.1092(19) | C(16)-H(16)         | 0.9500     |
| P(1)-C(1)     | 1.840(2)   | C(16)-C(17)         | 1.388(3)   |
| P(1)-C(3)     | 1.849(2)   | C(17)-H(17)         | 0.9500     |
| P(1)-C(9)     | 1.858(2)   | C(17)-C(18)         | 1.364(4)   |
| P(2)-C(2)     | 1.828(2)   | C(18)-H(18)         | 0.9500     |
| P(2)-C(15)    | 1.855(2)   | C(18)-C(19)         | 1.394(4)   |
| P(2)-C(21)    | 1.8510(19) | C(19)-H(19)         | 0.9500     |
| C(1)-H(1)     | 0.9500     | C(19)-C(20)         | 1.387(3)   |
| C(1)-C(2)     | 1.319(3)   | C(20)-H(20)         | 0.9500     |
| C(2)-H(2)     | 0.9500     | C(21)-C(22)         | 1.397(3)   |
| C(3)-C(4)     | 1.389(3)   | C(21)-C(26)         | 1.396(3)   |
| C(3)-C(8)     | 1.395(3)   | C(22)-H(22)         | 0.9500     |
| C(4)-H(4)     | 0.9500     | C(22)-C(23)         | 1.390(3)   |
| C(4)-C(5)     | 1.384(3)   | C(23)-H(23)         | 0.9500     |
| C(5)-H(5)     | 0.9500     | C(23)-C(24)         | 1.383(3)   |
| C(5)-C(6)     | 1.370(4)   | C(24)-H(24)         | 0.9500     |
| C(6)-H(6)     | 0.9500     | C(24)-C(25)         | 1.385(4)   |
| C(6)-C(7)     | 1.388(5)   | C(25)-H(25)         | 0.9500     |
| C(7)-H(7)     | 0.9500     | C(25)-C(26)         | 1.391(3)   |
| C(7)-C(8)     | 1.378(4)   | C(26)-H(26)         | 0.9500     |
| C(8)-H(8)     | 0.9500     | C(27)-H(27A)        | 1.00(2)    |
| C(9)-C(10)    | 1.398(3)   | C(27)-H(27B)        | 0.96(2)    |
| C(9)-C(14)    | 1.389(3)   | C(27)-H(27C)        | 0.95(3)    |
| C(10)-H(10)   | 0.9500     | P(1)-Fe(1)-P(1)#1   | 102.65(3)  |
| C(10)-C(11)   | 1.392(3)   | P(2)-Fe(1)-P(1)#1   | 99.405(18) |
| C(11)-H(11)   | 0.9500     | P(2)-Fe(1)-P(1)     | 86.531(18) |
| C(11)-C(12)   | 1.383(3)   | P(2)#1-Fe(1)-P(1)   | 99.405(18) |
| C(12)-H(12)   | 0.9500     | P(2)#1-Fe(1)-P(1)#1 | 86.530(18) |
| C(12)-C(13)   | 1.382(3)   | P(2)-Fe(1)-P(2)#1   | 170.56(3)  |

|                      |            |                   |            |
|----------------------|------------|-------------------|------------|
| C(27)-Fe(1)-P(1)     | 172.25(6)  | C(5)-C(6)-H(6)    | 120.1      |
| C(27)-Fe(1)-P(1)#1   | 84.00(6)   | C(5)-C(6)-C(7)    | 119.9(3)   |
| C(27)#1-Fe(1)-P(1)   | 84.00(6)   | C(7)-C(6)-H(6)    | 120.1      |
| C(27)#1-Fe(1)-P(1)#1 | 172.26(6)  | C(6)-C(7)-H(7)    | 120.0      |
| C(27)-Fe(1)-P(2)     | 88.47(5)   | C(8)-C(7)-C(6)    | 120.1(3)   |
| C(27)-Fe(1)-P(2)#1   | 84.83(5)   | C(8)-C(7)-H(7)    | 120.0      |
| C(27)#1-Fe(1)-P(2)   | 84.83(5)   | C(3)-C(8)-H(8)    | 119.7      |
| C(27)#1-Fe(1)-P(2)#1 | 88.47(5)   | C(7)-C(8)-C(3)    | 120.7(3)   |
| C(27)#1-Fe(1)-C(27)  | 89.66(11)  | C(7)-C(8)-H(8)    | 119.7      |
| C(1)-P(1)-Fe(1)      | 107.63(7)  | C(10)-C(9)-P(1)   | 120.60(15) |
| C(1)-P(1)-C(3)       | 100.04(10) | C(14)-C(9)-P(1)   | 120.95(15) |
| C(1)-P(1)-C(9)       | 96.56(9)   | C(14)-C(9)-C(10)  | 118.45(18) |
| C(3)-P(1)-Fe(1)      | 126.79(7)  | C(9)-C(10)-H(10)  | 119.8      |
| C(3)-P(1)-C(9)       | 96.79(10)  | C(11)-C(10)-C(9)  | 120.39(19) |
| C(9)-P(1)-Fe(1)      | 123.16(7)  | C(11)-C(10)-H(10) | 119.8      |
| C(2)-P(2)-Fe(1)      | 109.16(7)  | C(10)-C(11)-H(11) | 119.7      |
| C(2)-P(2)-C(15)      | 101.11(9)  | C(12)-C(11)-C(10) | 120.51(19) |
| C(2)-P(2)-C(21)      | 99.27(9)   | C(12)-C(11)-H(11) | 119.7      |
| C(15)-P(2)-Fe(1)     | 121.54(6)  | C(11)-C(12)-H(12) | 120.2      |
| C(21)-P(2)-Fe(1)     | 124.49(6)  | C(13)-C(12)-C(11) | 119.5(2)   |
| C(21)-P(2)-C(15)     | 97.05(8)   | C(13)-C(12)-H(12) | 120.2      |
| P(1)-C(1)-H(1)       | 120.6      | C(12)-C(13)-H(13) | 119.9      |
| C(2)-C(1)-P(1)       | 118.86(15) | C(12)-C(13)-C(14) | 120.2(2)   |
| C(2)-C(1)-H(1)       | 120.6      | C(14)-C(13)-H(13) | 119.9      |
| P(2)-C(2)-H(2)       | 121.3      | C(9)-C(14)-C(13)  | 120.93(19) |
| C(1)-C(2)-P(2)       | 117.46(15) | C(9)-C(14)-H(14)  | 119.5      |
| C(1)-C(2)-H(2)       | 121.3      | C(13)-C(14)-H(14) | 119.5      |
| C(4)-C(3)-P(1)       | 120.27(16) | C(16)-C(15)-P(2)  | 121.10(17) |
| C(4)-C(3)-C(8)       | 118.3(2)   | C(20)-C(15)-P(2)  | 121.14(15) |
| C(8)-C(3)-P(1)       | 121.46(19) | C(20)-C(15)-C(16) | 117.66(19) |
| C(3)-C(4)-H(4)       | 119.5      | C(15)-C(16)-H(16) | 119.4      |
| C(5)-C(4)-C(3)       | 120.9(2)   | C(17)-C(16)-C(15) | 121.3(2)   |
| C(5)-C(4)-H(4)       | 119.5      | C(17)-C(16)-H(16) | 119.4      |
| C(4)-C(5)-H(5)       | 119.9      | C(16)-C(17)-H(17) | 119.9      |
| C(6)-C(5)-C(4)       | 120.2(3)   | C(18)-C(17)-C(16) | 120.3(2)   |
| C(6)-C(5)-H(5)       | 119.9      | C(18)-C(17)-H(17) | 119.9      |

|                   |            |                     |           |
|-------------------|------------|---------------------|-----------|
| C(17)-C(18)-H(18) | 120.1      | C(24)-C(23)-H(23)   | 119.9     |
| C(17)-C(18)-C(19) | 119.8(2)   | C(23)-C(24)-H(24)   | 120.1     |
| C(19)-C(18)-H(18) | 120.1      | C(23)-C(24)-C(25)   | 119.9(2)  |
| C(18)-C(19)-H(19) | 119.9      | C(25)-C(24)-H(24)   | 120.1     |
| C(20)-C(19)-C(18) | 120.2(2)   | C(24)-C(25)-H(25)   | 119.9     |
| C(20)-C(19)-H(19) | 119.9      | C(24)-C(25)-C(26)   | 120.1(2)  |
| C(15)-C(20)-H(20) | 119.6      | C(26)-C(25)-H(25)   | 119.9     |
| C(19)-C(20)-C(15) | 120.8(2)   | C(21)-C(26)-H(26)   | 119.7     |
| C(19)-C(20)-H(20) | 119.6      | C(25)-C(26)-C(21)   | 120.6(2)  |
| C(22)-C(21)-P(2)  | 120.81(15) | C(25)-C(26)-H(26)   | 119.7     |
| C(26)-C(21)-P(2)  | 120.65(16) | Fe(1)-C(27)-H(27A)  | 112.0(14) |
| C(26)-C(21)-C(22) | 118.54(18) | Fe(1)-C(27)-H(27B)  | 111.8(14) |
| C(21)-C(22)-H(22) | 119.7      | Fe(1)-C(27)-H(27C)  | 111.7(15) |
| C(23)-C(22)-C(21) | 120.6(2)   | H(27A)-C(27)-H(27B) | 108.2(19) |
| C(23)-C(22)-H(22) | 119.7      | H(27A)-C(27)-H(27C) | 107(2)    |
| C(22)-C(23)-H(23) | 119.9      | H(27B)-C(27)-H(27C) | 106(2)    |
| C(24)-C(23)-C(22) | 120.2(2)   |                     |           |

---

Symmetry transformations used to generate equivalent atoms:

#1 -x+1,y,-z+1/2

Table 4. Anisotropic displacement parameters ( $\text{\AA}^2 \times 10^3$ ) for neijd07. The anisotropic displacement factor exponent takes the form:  $-2\pi^2 [ h^2 a^{*2} U_{11} + \dots + 2 h k a^* b^* U_{12} ]$

|     | $U_{11}$ | $U_{22}$ | $U_{33}$ | $U_{23}$ | $U_{13}$ | $U_{12}$ |
|-----|----------|----------|----------|----------|----------|----------|
| Fe1 | 16(1)    | 24(1)    | 17(1)    | 0        | 3(1)     | 0        |
| P1  | 21(1)    | 28(1)    | 24(1)    | -2(1)    | 3(1)     | -4(1)    |
| P2  | 19(1)    | 28(1)    | 19(1)    | 1(1)     | 4(1)     | 1(1)     |
| C1  | 23(1)    | 36(1)    | 32(1)    | 4(1)     | 6(1)     | -6(1)    |
| C2  | 22(1)    | 38(1)    | 25(1)    | 7(1)     | 7(1)     | -1(1)    |
| C3  | 35(1)    | 29(1)    | 38(1)    | -6(1)    | 3(1)     | -7(1)    |
| C4  | 40(1)    | 32(1)    | 38(1)    | -8(1)    | 6(1)     | -4(1)    |
| C5  | 52(2)    | 37(1)    | 70(2)    | -18(1)   | 12(1)    | -2(1)    |
| C6  | 77(2)    | 35(1)    | 116(3)   | -30(2)   | 18(2)    | -10(1)   |
| C7  | 63(2)    | 46(2)    | 121(3)   | -25(2)   | 23(2)    | -26(2)   |
| C8  | 42(1)    | 40(1)    | 81(2)    | -16(1)   | 13(1)    | -14(1)   |
| C9  | 21(1)    | 38(1)    | 25(1)    | -1(1)    | 2(1)     | -5(1)    |
| C10 | 24(1)    | 44(1)    | 28(1)    | -8(1)    | 4(1)     | -4(1)    |
| C11 | 29(1)    | 53(1)    | 26(1)    | -7(1)    | 4(1)     | -6(1)    |
| C12 | 23(1)    | 58(1)    | 28(1)    | -2(1)    | -1(1)    | -4(1)    |
| C13 | 24(1)    | 57(2)    | 30(1)    | -3(1)    | 4(1)     | 2(1)     |
| C14 | 25(1)    | 46(1)    | 24(1)    | -4(1)    | 4(1)     | -1(1)    |
| C15 | 25(1)    | 35(1)    | 18(1)    | 1(1)     | 1(1)     | 7(1)     |
| C16 | 25(1)    | 51(1)    | 26(1)    | -1(1)    | 4(1)     | 8(1)     |
| C17 | 34(1)    | 60(2)    | 31(1)    | -3(1)    | 5(1)     | 20(1)    |
| C18 | 48(1)    | 53(2)    | 30(1)    | -6(1)    | 2(1)     | 28(1)    |
| C19 | 49(1)    | 36(1)    | 35(1)    | -1(1)    | 3(1)     | 12(1)    |
| C20 | 36(1)    | 32(1)    | 28(1)    | -1(1)    | 8(1)     | 7(1)     |
| C21 | 23(1)    | 36(1)    | 20(1)    | 4(1)     | 5(1)     | 7(1)     |
| C22 | 26(1)    | 38(1)    | 24(1)    | 0(1)     | 4(1)     | 3(1)     |
| C23 | 30(1)    | 52(1)    | 24(1)    | -3(1)    | 4(1)     | 5(1)     |
| C24 | 35(1)    | 58(2)    | 21(1)    | 8(1)     | 6(1)     | 13(1)    |
| C25 | 41(1)    | 44(1)    | 30(1)    | 13(1)    | 11(1)    | 10(1)    |
| C26 | 31(1)    | 37(1)    | 28(1)    | 5(1)     | 8(1)     | 4(1)     |
| C27 | 22(1)    | 30(1)    | 22(1)    | -2(1)    | 3(1)     | -3(1)    |



Table 5. Hydrogen coordinates ( $\times 10^4$ ) and isotropic displacement parameters ( $\text{\AA}^2 \times 10^3$ ) for neijd07.

|      | x        | y       | z        | U(eq) |
|------|----------|---------|----------|-------|
| H1   | 2085     | 5996    | 2936     | 36    |
| H2   | 2638     | 6468    | 3907     | 34    |
| H4   | 5320     | 5706    | 1710     | 44    |
| H5   | 5477     | 4862    | 1347     | 64    |
| H6   | 3867     | 4316    | 1306     | 90    |
| H7   | 2075     | 4614    | 1623     | 91    |
| H8   | 1914     | 5453    | 1996     | 65    |
| H10  | 2718     | 6185    | 740      | 38    |
| H11  | 1051     | 6405    | -9       | 43    |
| H12  | -482     | 6870    | 384      | 44    |
| H13  | -351     | 7113    | 1535     | 44    |
| H14  | 1312     | 6896    | 2287     | 38    |
| H16  | 2168     | 7238    | 4113     | 41    |
| H17  | 1392     | 7996    | 4496     | 50    |
| H18  | 2382     | 8763    | 4412     | 52    |
| H19  | 4151     | 8781    | 3913     | 48    |
| H20  | 4920     | 8028    | 3506     | 38    |
| H22  | 5898     | 7477    | 4521     | 35    |
| H23  | 6952     | 7266    | 5575     | 43    |
| H24  | 6852     | 6439    | 6013     | 46    |
| H25  | 5616     | 5831    | 5426     | 45    |
| H26  | 4528     | 6042    | 4382     | 38    |
| H27A | 5930(20) | 7795(9) | 2714(12) | 29(6) |
| H27B | 6470(20) | 7429(9) | 3317(12) | 27(6) |
| H27C | 6950(20) | 7408(9) | 2622(12) | 31(6) |

Table 6. Torsion angles [°] for neijd07.

|                |             |                 |             |
|----------------|-------------|-----------------|-------------|
| Fe1-P1-C1-C2   | 5.40(19)    | C6-C7-C8-C3     | 0.1(6)      |
| Fe1-P1-C3-C4   | -14.8(2)    | C8-C3-C4-C5     | -0.9(4)     |
| Fe1-P1-C3-C8   | 165.75(19)  | C9-P1-C1-C2     | -122.50(18) |
| Fe1-P1-C9-C10  | 99.31(18)   | C9-P1-C3-C4     | 126.19(19)  |
| Fe1-P1-C9-C14  | -81.37(18)  | C9-P1-C3-C8     | -53.3(2)    |
| Fe1-P2-C2-C1   | -2.83(19)   | C9-C10-C11-C12  | 0.1(4)      |
| Fe1-P2-C15-C16 | 136.16(14)  | C10-C9-C14-C13  | 0.1(3)      |
| Fe1-P2-C15-C20 | -47.52(18)  | C10-C11-C12-C13 | -0.1(4)     |
| Fe1-P2-C21-C22 | 86.92(17)   | C11-C12-C13-C14 | 0.2(4)      |
| Fe1-P2-C21-C26 | -92.80(16)  | C12-C13-C14-C9  | -0.2(4)     |
| P1-C1-C2-P2    | -1.7(2)     | C14-C9-C10-C11  | -0.1(3)     |
| P1-C3-C4-C5    | 179.6(2)    | C15-P2-C2-C1    | 126.41(17)  |
| P1-C3-C8-C7    | -179.9(3)   | C15-P2-C21-C22  | -49.51(17)  |
| P1-C9-C10-C11  | 179.23(17)  | C15-P2-C21-C26  | 130.77(16)  |
| P1-C9-C14-C13  | -179.19(18) | C15-C16-C17-C18 | -0.9(3)     |
| P2-C15-C16-C17 | 176.74(16)  | C16-C15-C20-C19 | 0.4(3)      |
| P2-C15-C20-C19 | -176.03(16) | C16-C17-C18-C19 | 0.8(3)      |
| P2-C21-C22-C23 | -179.09(15) | C17-C18-C19-C20 | -0.1(3)     |
| P2-C21-C26-C25 | 178.42(16)  | C18-C19-C20-C15 | -0.5(3)     |
| C1-P1-C3-C4    | -135.88(19) | C20-C15-C16-C17 | 0.3(3)      |
| C1-P1-C3-C8    | 44.7(2)     | C21-P2-C2-C1    | -134.45(17) |
| C1-P1-C9-C10   | -144.63(18) | C21-P2-C15-C16  | -85.63(17)  |
| C1-P1-C9-C14   | 34.69(19)   | C21-P2-C15-C20  | 90.68(17)   |
| C2-P2-C15-C16  | 15.30(17)   | C21-C22-C23-C24 | 0.9(3)      |
| C2-P2-C15-C20  | -168.38(16) | C22-C21-C26-C25 | -1.3(3)     |
| C2-P2-C21-C22  | -152.04(16) | C22-C23-C24-C25 | -1.8(3)     |
| C2-P2-C21-C26  | 28.24(18)   | C23-C24-C25-C26 | 1.1(3)      |
| C3-P1-C1-C2    | 139.38(18)  | C24-C25-C26-C21 | 0.4(3)      |
| C3-P1-C9-C10   | -43.65(19)  | C26-C21-C22-C23 | 0.6(3)      |
| C3-P1-C9-C14   | 135.67(19)  |                 |             |
| C3-C4-C5-C6    | 0.5(5)      |                 |             |
| C4-C3-C8-C7    | 0.6(5)      |                 |             |
| C4-C5-C6-C7    | 0.3(6)      |                 |             |
| C5-C6-C7-C8    | -0.6(6)     |                 |             |

---

Symmetry transformations used to generate equivalent atoms: #1  $-x+1,y,-z+1/2$

## References

1. R. Shang, L. Ilies, S. Asako and E. Nakamura, *Journal of the American Chemical Society*, 2014, **136**, 14349-14352.
2. R. Shang, L. Ilies and E. Nakamura, *Journal of the American Chemical Society*, 2015, **137**, 7660-7663.
3. M. G. T. C. Ribeiro and A. A. S. C. Machado, *Journal of Chemical Education*, 2011, **88**, 947-953.
